# Supplementary material for: Intrinsic tumor factors and extrinsic environmental and social exposures contribute to endometrial cancer recurrence patterns
Source: Research Square preprint supplement (doi:10.21203/rs.3.rs-8682460/v1), 2026-01-30
Supplement: Supplementary file 1 [file 03beea09a39784cc2b70666f.xlsx]

## Sheet: Supplementary Table 5
Type	Low	High	Non-endometrioid	Total
CAF	0.0213489	0.00415933	0.00499424	0.00586694
B Cells			0.0019385	0.0019385
CD8+ T Cells			0.000977901	0.000977901
Cytotoxic lymphocytes		0.00240698		0.00240698
Fibroblasts	0.0213489	0.0194166	0.0198098	0.0201918
Macrophages M1		0.000980009	0.00160075	0.00129038
Monocytic lineage			0.00373522	0.00373522
Neutrophils		0.00104354		0.00104354
T Cells		0.000540795	0.00190326	0.00122203
Treg Cells		0.000568015		0.000568015
Clinic	0.00599579			0.00599579
BMI	0.00599579			0.00599579
CNV	0.0137474		0.00349062	0.00947376
ADA			0.00371897	0.00371897
ARHGEF3	0.0239099			0.0239099
ATAD3C			0.00293364	0.00293364
BSN.AS2	0.0170812			0.0170812
C2orf72			0.00388518	0.00388518
C3orf49	0.011781			0.011781
C5orf66	0.012065			0.012065
CLDN3			0.00196101	0.00196101
CSE1L.AS1	0.0210768			0.0210768
CYB561D1	0.0164416			0.0164416
DLX2.AS1	0.0192867			0.0192867
DPYSL4			0.0024629	0.0024629
ELP6			0.00345838	0.00345838
ENST00000447600	0.00837271			0.00837271
ENST00000499143	0.0109321			0.0109321
ENST00000500537	0.0106778			0.0106778
ENST00000523971			0.00308809	0.00308809
ENST00000563734	0.0170237			0.0170237
EVA1A	0.0115698			0.0115698
FAAHP1			0.00310122	0.00310122
FAM49A			0.00409154	0.00409154
FAM66A	0.0127136			0.0127136
GAGE10	0.0112741			0.0112741
GBP7	0.0107491			0.0107491
GTF2E2			0.00407645	0.00407645
KIF25.AS1	0.0152677			0.0152677
KRT16P1	0.00681441			0.00681441
KRT9			0.00390375	0.00390375
LINC00571			0.00338534	0.00338534
LINC00663	0.00915321			0.00915321
LINC00709	0.0161476			0.0161476
LINC00905	0.020972			0.020972
LINC01040	0.0168239			0.0168239
LINC01299	0.0106098			0.0106098
LINC01864	0.0149561			0.0149561
LINC01983	0.0100627			0.0100627
LINC02186			0.00277829	0.00277829
LRRC20			0.00459004	0.00459004
LY6D	0.0067925			0.0067925
MAPK6			0.006218	0.006218
MIR7975			0.00283903	0.00283903
MPZL1			0.00629416	0.00629416
MS4A4E			0.00278664	0.00278664
N4BP3			0.00368657	0.00368657
OR5P2	0.0163358			0.0163358
P4HA2.AS1	0.00895289			0.00895289
PCDHA8	0.00722631			0.00722631
PDE11A			0.00607424	0.00607424
RAN	0.0130396			0.0130396
RNU1.13P	0.0179344			0.0179344
SPANXA2			0.00347165	0.00347165
SS18			0.00293541	0.00293541
STAG3L4	0.0123609			0.0123609
TFAP2D			0.00191045	0.00191045
TMEM178A	0.0128687			0.0128687
TMEM220.AS1	0.0133489			0.0133489
TOLLIP.AS1	0.0162861			0.0162861
USP41	0.0202516			0.0202516
WBP1			0.00180722	0.00180722
Expression		0.0531587	0.173151	0.0725123
ENSG00000075340.23			0.174438	0.174438
ENSG00000099954.18		0.0553197		0.0553197
ENSG00000100360.15		0.0235201		0.0235201
ENSG00000101144.13		0.0419325		0.0419325
ENSG00000102390.11		0.0322646		0.0322646
ENSG00000103316.11		0.0804623		0.0804623
ENSG00000105497.8		0.0217717		0.0217717
ENSG00000105880.7			0.204457	0.204457
ENSG00000134594.5		0.00291356		0.00291356
ENSG00000137491.15			0.179835	0.179835
ENSG00000137745.12		0.168986		0.168986
ENSG00000142528.16		0.0169475		0.0169475
ENSG00000143556.9		0.305623		0.305623
ENSG00000151612.18		0.0392605		0.0392605
ENSG00000152778.9		0.0380999		0.0380999
ENSG00000159307.19		0.0410163		0.0410163
ENSG00000161544.10		0.0115486		0.0115486
ENSG00000165102.15		0.0470021		0.0470021
ENSG00000166035.11			0.00949461	0.00949461
ENSG00000166428.13		0.00650291		0.00650291
ENSG00000167083.7		0.00219238		0.00219238
ENSG00000167191.12		0.0431893		0.0431893
ENSG00000186765.11		0.00551188		0.00551188
ENSG00000188039.14			0.29753	0.29753
ENSG00000197520.10		0.00250559		0.00250559
ENSG00000198732.10		0.106046		0.106046
ENSG00000213226.4		0.00236583		0.00236583
ENSG00000225098.1		0.00195639		0.00195639
ENSG00000256612.7		0.0834698		0.0834698
ENSG00000278540.5		0.199732		0.199732
ENSG00000284138.1		0.00198546		0.00198546
Isoforms	0.0172747	0.000983529	0.00311957	0.00586485
ENST00000313525.4			0.00298087	0.00298087
ENST00000370932.6		0.000793063		0.000793063
ENST00000379731.4		0.00195603		0.00195603
ENST00000393107.2			0.00537995	0.00537995
ENST00000416052.1	0.00606586			0.00606586
ENST00000418920.5	0.0317305			0.0317305
ENST00000419278.2		0.00182649		0.00182649
ENST00000465807.1		0.000378084		0.000378084
ENST00000471234.5		0.000936604		0.000936604
ENST00000486394.1			0.000997902	0.000997902
ENST00000519825.5	0.0145321			0.0145321
ENST00000526092.6		0.00116621		0.00116621
ENST00000537466.6		0.000416149		0.000416149
ENST00000563560.1		0.000858935		0.000858935
ENST00000616738.4		0.000942623		0.000942623
ENST00000625129.1	0.026528			0.026528
ENST00000644164.1		0.000561107		0.000561107
ENST00000646475.1	0.00751693			0.00751693
Microbiome	0.069475	0.0173835	0.0105122	0.035249
Acinetobacter	0.0214616	0.0103334		0.0158975
Aspergillus	0.0264159	0.00339856		0.0149072
Bacillus	0.281125	0.0420379	0.0957006	0.139621
Botrytis		0.0099771		0.0099771
Brettanomyces	0.037636	0.0295106		0.0335733
Burkholderia	0.0026133			0.0026133
Candida	0.040576	0.0567638	0.00518734	0.0341757
Cutibacterium	0.148104	0.00179296		0.0749485
Eremothecium		0.0012607		0.0012607
Escherichia	0.0541757	0.0600907	0.00314754	0.039138
Fulvia		0.00535076	0.000899656	0.00312521
Fusarium		0.0038892		0.0038892
Klebsiella	0.0425072	0.00625926	0.00196802	0.0169115
Leishmania		0.00229287		0.00229287
Malassezia	0.0303198	0.0407053		0.0355125
Plasmodium	0.0236471	0.00669687	0.00163666	0.0106602
Pseudomonas	0.0359779	0.00881077		0.0223944
Puccinia	0.0264523	0.00939247	0.00105177	0.0122989
Rhizoctonia	0.0752738	0.028479		0.0518764
Saccharomyces		0.0133634		0.0133634
Schizosaccharomyces		0.00926468	0.00138199	0.00532334
Staphylococcus	0.0221201			0.0221201
Stenotrophomonas	0.101145			0.101145
Streptococcus	0.0895101			0.0895101
Sugiyamaella		0.00944607	0.0021577	0.00580188
Talaromyces	0.00966047	0.00319439	0.0010225	0.00462579
Theileria	0.0793982	0.0278388	0.0014808	0.0362392
Thermothielavioides	0.268583	0.019644		0.144113
Ustilaginoidea	0.0422721	0.0247936		0.0335329
Pollutants	0.00961021	0.00145726	0.00180537	0.00429095
O3	0.00961021	0.00145726	0.00180537	0.00429095
Impair water bodies	0.00152471	0.00691067	0.00405483	0.0041634
Prox old housing/walkability	0.00138601	0.0144852	0.00566308	0.00717809
Percentage racial min	0.00152938			0.00152938
Prox toxic sites	0.00195969			0.00195969
Prox road, airports	0.000841648		0.00172909	0.00128537
Low food access			0.00263939	0.00263939
Pseudogenes		0.0146314	0.0466662	0.0275978
ENSG00000128262.8		0.0067595	0.274061	0.14041
ENSG00000131401.11		0.059274	0.00348209	0.0313781
ENSG00000180764.13		0.0125022	0.0309784	0.0217403
ENSG00000197847.12		0.00257289		0.00257289
ENSG00000204118.2			0.00329871	0.00329871
ENSG00000205318.5			0.011705	0.011705
ENSG00000213226.4		0.00236583		0.00236583
ENSG00000213252.3			0.0148494	0.0148494
ENSG00000214776.12		0.00594517	0.00401939	0.00498228
ENSG00000214796.8		0.00196673	0.00209319	0.00202996
ENSG00000217646.1		0.0023488		0.0023488
ENSG00000227948.4		0.00478752		0.00478752
ENSG00000228169.3		0.0265177	0.0496094	0.0380635
ENSG00000231848.1		0.00544948	0.00767561	0.00656255
ENSG00000232702.3		0.00840931		0.00840931
ENSG00000234358.1		0.001453		0.001453
ENSG00000234629.1			0.00341397	0.00341397
ENSG00000234975.6			0.154304	0.154304
ENSG00000237973.1		0.00368547		0.00368547
ENSG00000238275.2		0.00123556		0.00123556
ENSG00000240069.1		0.0015006		0.0015006
ENSG00000240787.1			0.0064665	0.0064665
ENSG00000244306.11		0.018637		0.018637
ENSG00000248590.2		0.00321141	0.110581	0.0568963
ENSG00000249839.1		0.0863223	0.0492907	0.0678065
ENSG00000255780.1		0.00235786		0.00235786
ENSG00000256612.7		0.0834698		0.0834698
ENSG00000256664.1			0.0600457	0.0600457
ENSG00000259655.1		0.00312418		0.00312418
ENSG00000277304.1			0.00745078	0.00745078
ENSG00000278212.2		0.000490902		0.000490902
ENSG00000284138.1		0.00198546		0.00198546
ENSG00000285781.1		0.0194111		0.0194111
SNV		0.000493937		0.000493937
ALPK2		0.000493937		0.000493937
